# Supplementary material for: Red and green-emitting biocompatible carbon quantum dots for efficient tandem luminescent solar concentrators
Source: Royal Society of Chemistry journal article supplement (doi:10.1039/d1tc03095g), 2021-01-01
Supplement: d1tc03095g1.pdf [file d1tc03095g1.pdf]

## **Red and Green-emitting Biocompatible Carbon Quantum Dots for Efficient Tandem Luminescent Solar Concentrators**

Yi Han<sup>b</sup>, Xiujian Zhao<sup>a</sup>, Alberto Vomiero<sup>c,d,\*</sup>, Xiao Gong<sup>a,\*</sup>, Haiguang Zhao<sup>e,\*</sup>

<sup>a</sup>State Key Laboratory of Silicate Materials for Architectures, Wuhan University of Technology, Wuhan 430070, P. R. China

<sup>b</sup>School of Basic Medicine, Qingdao University, No. 308 Ningxia Road, Qingdao 266071, P.R. China

<sup>c</sup>Department of Molecular Science and Nano Systems, Ca' Foscari University of Venice Via Torino 155, 30172 Venezia Mestre, Italy

<sup>d</sup>Division of Materials Science, Department of Engineering Sciences and Mathematics, Luleå University of Technology, 971 87 Luleå, Sweden

<sup>e</sup>College of Physics & State Key Laboratory of Bio-Fibers and Eco-Textiles, Qingdao University, No. 308 Ningxia Road, Qingdao 266071, P.R. China

\*Corresponding authors. Email: [alberto.vomiero@unive.it](mailto:alberto.vomiero@unive.it); [xgong@whut.edu.cn](mailto:xgong@whut.edu.cn); [hgzhao@qdu.edu.cn](mailto:hgzhao@qdu.edu.cn).

## Simulation:

The external optical efficiency of the LSCs can be expressed as:<sup>1</sup>

$$\eta_{opt} = \eta_{Abs} \cdot \eta_{internal} \quad (1)$$

$\eta_{Abs}$  can be calculated as:<sup>1</sup>

$$\eta_{Abs} = (1 - R) \frac{\int_0^{\infty} I_{in}(\lambda)(1 - e^{-\alpha(\lambda)d})d\lambda}{\int_0^{\infty} I_{in}(\lambda)d\lambda} \quad (2)$$

In which  $\alpha$  is the absorption coefficient [calculated as  $\alpha = \ln(10)\frac{A}{d}$ , where  $d$  is the effective length and  $A$  the absorption of the LSC],  $I_{in}$  is the Sun irradiance.

$R$  can be calculated as follows:<sup>1</sup>

$$R = \frac{(n_{glass} - n)^2}{(n_{glass} + n)^2} \quad (3)$$

$R$  at the interface of glass and air is 4% as the  $n_{glass}$  is 1.50 and  $n_{air}$  is 1.  $R$  at the interface of glass and the mixture of the glass and the C-dots/PVP film is in the range of 0.36-0.44%, depending on the refractive index of the mixture.

A spectrally averaged internal efficiency ( $\eta_{internal}$ ) over the PL of the C-dots was calculated as:<sup>1</sup>

$$\eta_{internal} = \frac{\int_0^{\infty} \frac{\eta_{QY}P_{TIR}}{1 + \beta\alpha(\lambda)L_{lsc}(1 - \eta_{QY}P_{TIR})} S_{PL}(\lambda)d\lambda}{\int_0^{\infty} S_{PL}(\lambda)d\lambda}$$

(4)

in which  $S_{PL}(\lambda)$  is the PL spectrum;  $\beta$  is a numerical value fixed to 1.4 and  $L_{LSC}$  is the length of the LSC.  $\eta_{QY}$  is the quantum yield of the C-dots/PVP film.

Assuming an isotropic emission,  $P_{TIR}$  is defined by the escape cone identified by the critical angle  $\theta$  of the solution/glass interface:<sup>1</sup>

$$P_{TIR} = \sqrt{1 - \left(\frac{n_{air}}{n}\right)^2} \quad (5)$$

## Figures

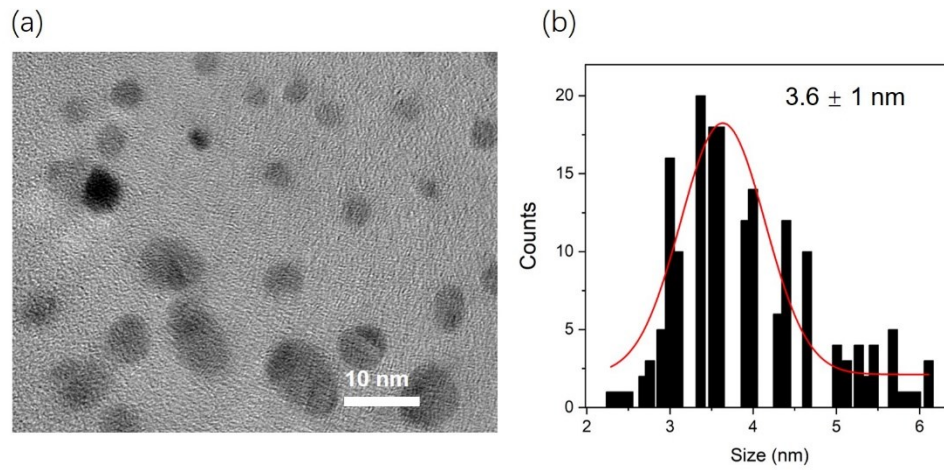

**Figure 1.** TEM image (a) and size distribution (b) of C-dots synthesized at 160 °C using CA/urea as precursors and DMF as solvent.

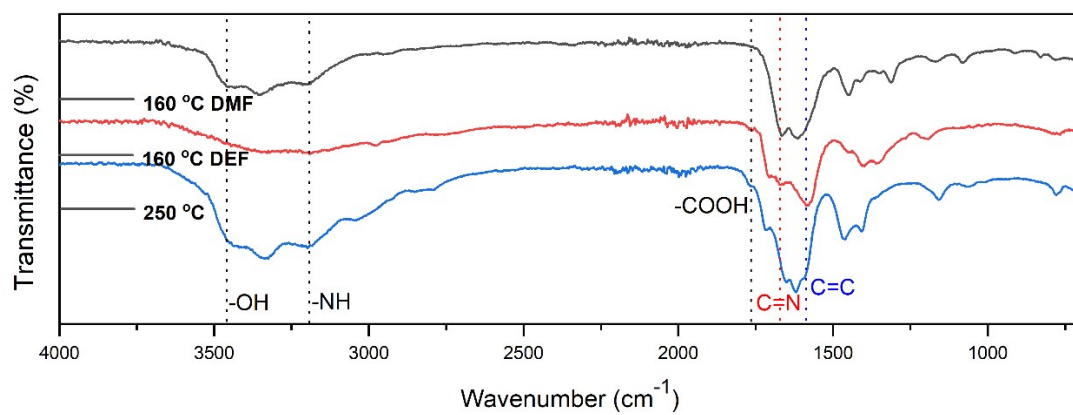

**Figure S2.** FI-IR spectra of the synthesized C-dots.

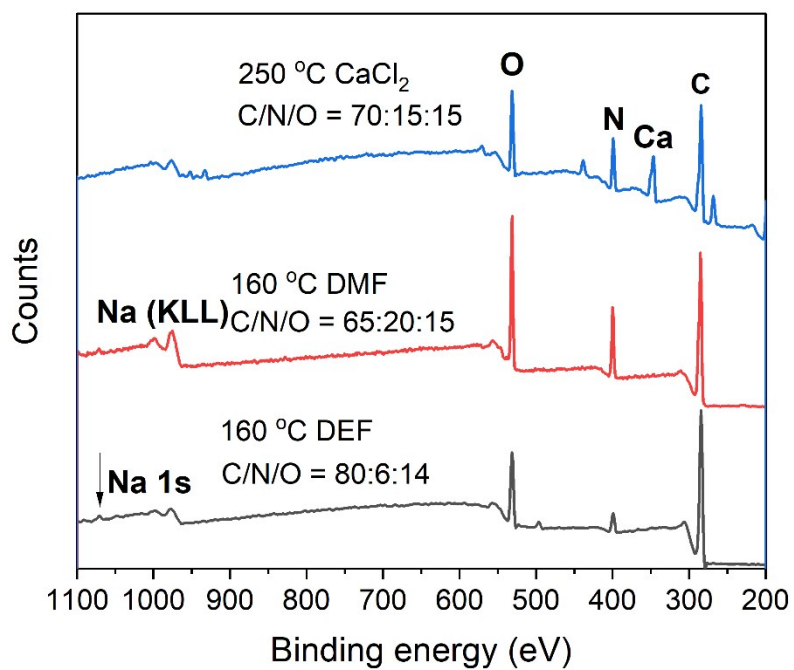

**Figure S3.** XPS spectra of the synthesized C-dots.

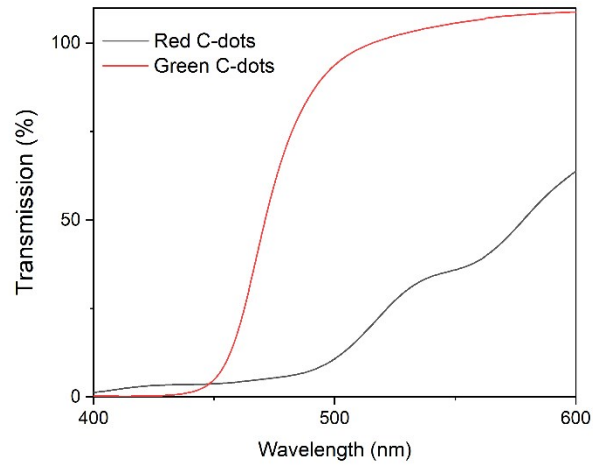

**Figure S4.** Transmission of the C-dots based LSCs in the wavelength range of 400-600 nm.

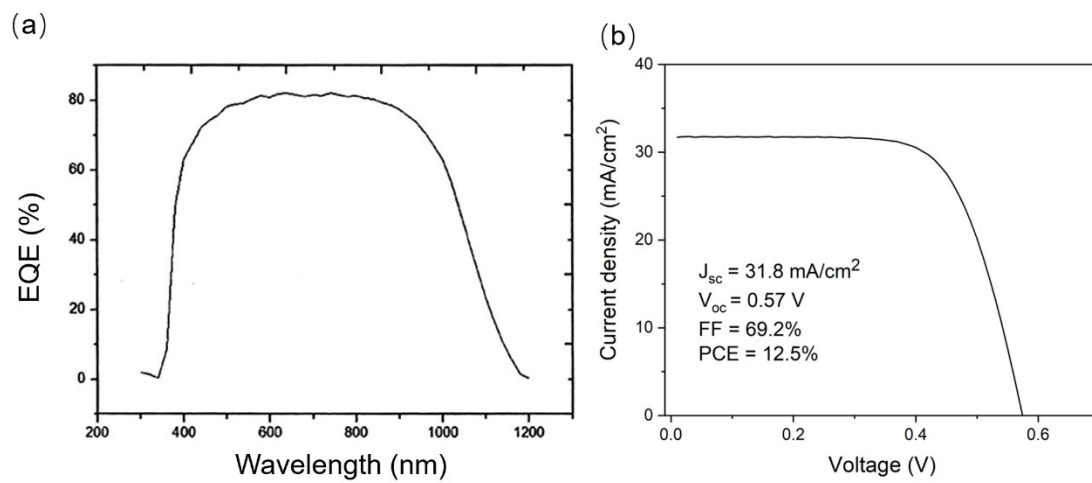

**Figure S5.** (a) External quantum efficiency (EQE) and (b) J-V response of the commercial solar cell used in this work upon simulated sunlight ( $100 \text{ mW/cm}^2$ ).

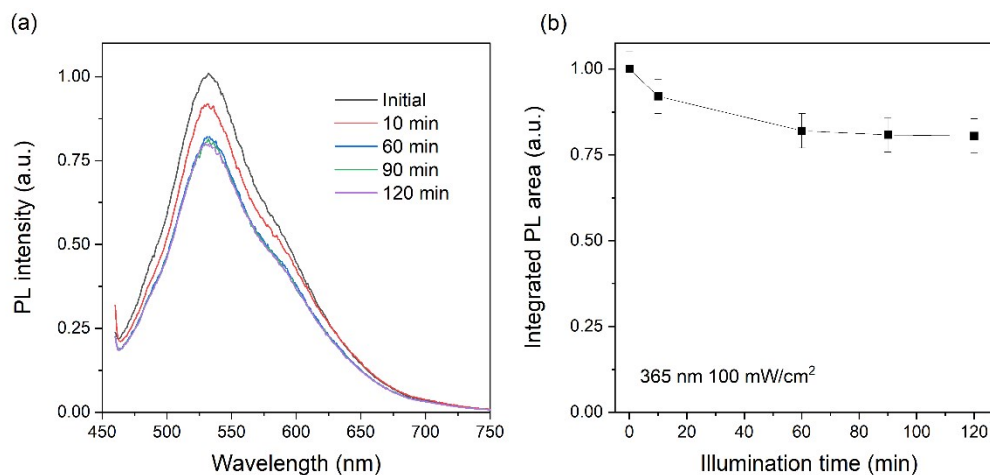

**Figure S6.** (a) PL intensity and (b) integrated PL area of the LSC based on red C-dots ( $0.5 \text{ mg/cm}^3$ ) as a function of illumination time. The excitation wavelength is 430 nm. The LSC was upon 365 UV lamp ( $100 \text{ mW/cm}^2$ ).

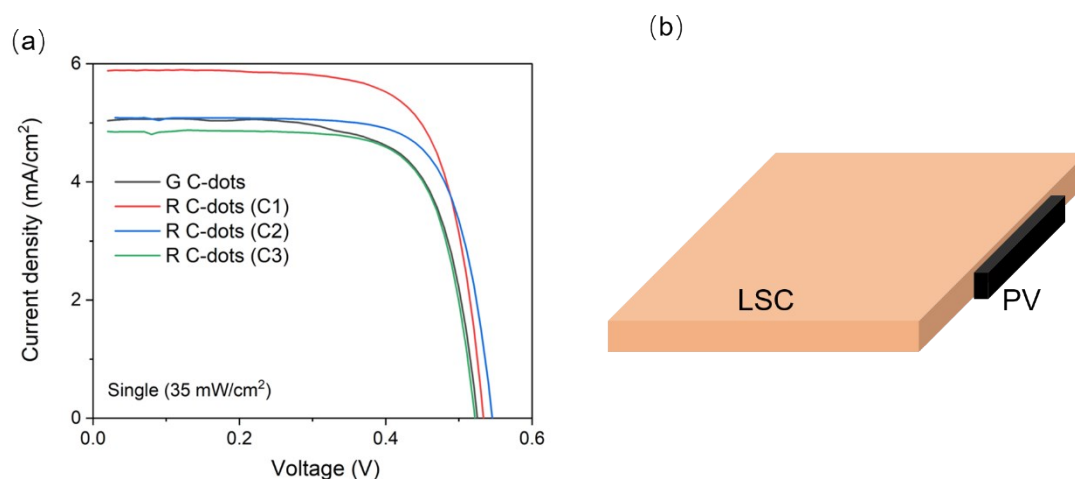

**Figure S7.** (a) J-V response of silicon PV attached on one edge of the LSC (as shown in Fig. S7b) under the natural sunlight ( $35 \text{ mW/cm}^2$ ). (d) tandem LSC ( $70 \text{ mW/cm}^2$ ).

## Reference

1. V. I. Klimov, T. A. Baker, J. Lim, K. A. Velizhanin and H. McDaniel, *ACS Photonics*, 2016, **3**, 1138.
